# Supplementary material
Source: Springer Nature journal article supplement (https://www.springermedizin.de/resource/supplementary/12936_2011_2034_MOESM1_ESM.pdf/9543358)
Supplement: MOESM1 [file 9543358]

Placental volumes  
250 women

No scan in window  
17 women

Anterior placenta  
133 women

Poor quality  
4 women

Placental volumes  
96 women

Lost to follow up  
8 women

Early Pre-eclampsia  
1 woman

Miscarriage  
1 woman

Malaria before CRL  
2 women

Placental volumes  
84 women
